# Supplementary material for: Preoperative predictors for a successful return to sport following anterior cruciate ligament reconstruction (ACLR): a protocol for a systematic review and meta-analysis
Source: HighWire-hosted journal article supplement (doi:10.1136/bmjopen-2020-048295), 2021-12-01
Supplement: bmjopen-2020-048295supp002_data_supplement.pdf [file bmjopen-2020-048295supp002_data_supplement.pdf]

## Supplementary File 2 – Search Strategy

| Category            | ACL                        | Preoperative        | Prognostic factors | RTS/preinjury level         |
|---------------------|----------------------------|---------------------|--------------------|-----------------------------|
| <b>MeSH Heading</b> | Anterior cruciate ligament | Preoperative Period | Risk factors       | Return to sport             |
| <b>Alternatives</b> |                            | Preop*              | Risk               | Return to preinjury level   |
|                     |                            | Pre-op*             | Predictor          | Return to physical activity |
|                     |                            | Periop*             | Prognostic         | Return to Performance       |

All terms in each category will be combined with OR. All terms across categories will be combined with AND as follows:

1. Anterior cruciate ligament
2. ACL
3. 1 OR 2
4. Preoperative period
5. Preop\*
6. Pre-op\*
7. Periop\*
8. 5 OR 6 OR 7
9. Risk factors
10. Risk
11. Predictor
12. Prognostic
13. 9 OR 10 OR 11 OR 12
14. Return to sport
15. Return to preinjury level
16. Return to physical activity
17. Return to performance
18. 14 OR 15 OR 16 OR 17
19. 3 AND 8 AND 13 AND 18
